# Supplementary material
Source: PubMed Central journal article supplement (PMC6289684)
Supplement: NIHMS1510111-supplement-1.pdf [file NIHMS1510111-supplement-1.pdf]

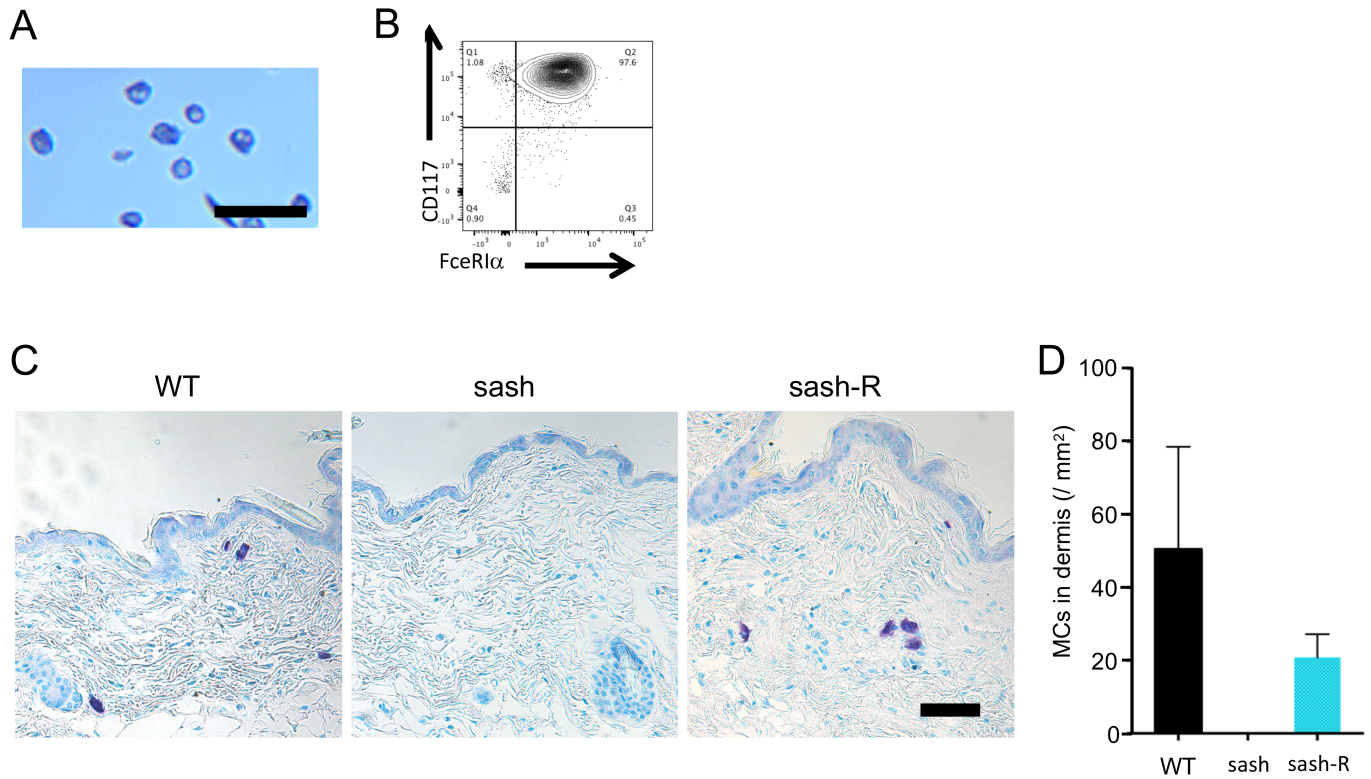

**Supplementary Figure S1. Reconstitution of sash mice with terminally differentiated cultured bone-marrow derived mast cells (BMMCs).**

**A–B**, Terminal differentiation of cultured BMMCs was examined by toluidine blue staining and flow cytometry. **A**, A representative image of cultured BMMCs stained with toluidine blue *in vitro* is shown. Bar = 50  $\mu$ m. **B**, A representative plot of BMMCs analyzed by flow cytometry is shown. Differentiated BMMCs were stained for CD117 and Fc $\epsilon$ RI. We used fully differentiated BMMCs only when 97-98 % of BMMCs were double-positive for CD117 and Fc $\epsilon$ RI $\alpha$ . **C–D**, Reconstitution of MCs with cultured BMMCs was examined by toluidine blue staining of skin biopsies. Fully differentiated  $4 \times 10^6$  BMMCs were injected into the flank skin of 4-week-old sash mice. **C**, Representative images of toluidine-stained skin tissue of the back of mice 8 weeks after the MC reconstitution. Bar = 50  $\mu$ m. **D**, Quantitation of MCs in the skin. Error bars show means  $\pm$  s.e.m.

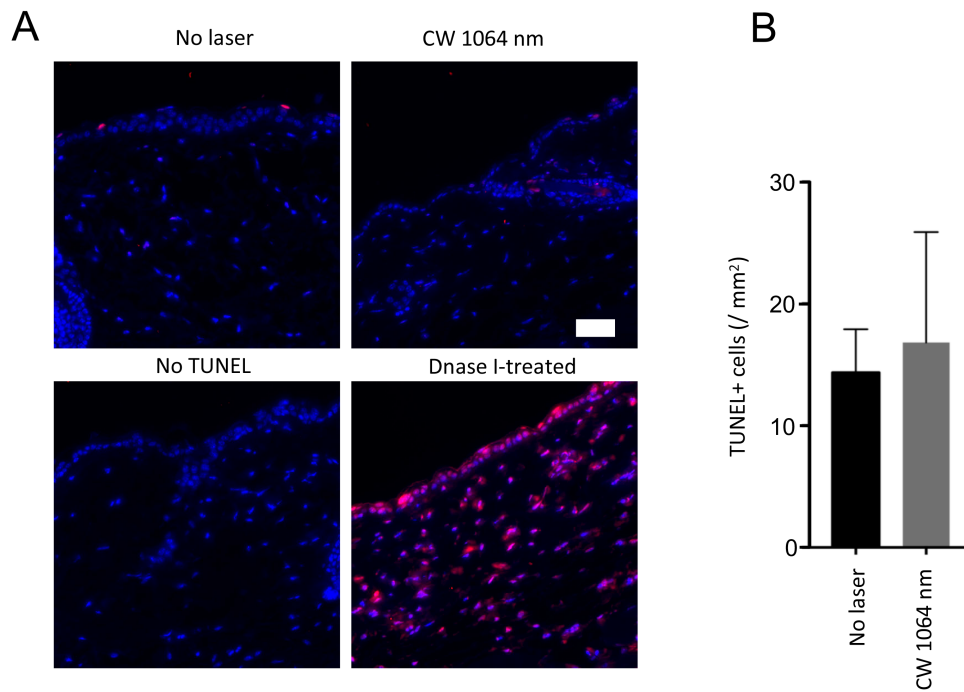

**Supplementary Figure S2. The effect of the NIR laser on the skin tissue.**

Tissue damage in the laser-treated skin was examined by TUNEL staining. TUNEL staining was performed to detect apoptotic cells 6 hours after the CW near-infrared (NIR) laser treatment in the back skin of mice. **A**, Representative images of TUNEL-stained skin tissue are presented. Apoptotic cells were identified in red. Nuclei were identified by counter staining using DAPI. The bar indicates 50  $\mu$ m. **B**, Quantification of TUNEL<sup>+</sup> cells. Note that no significant increase in apoptotic cells was observed. Error bars show means  $\pm$  s.e.m. Representative results are shown from 2 independent experiments.  $n = 3$  for each group.

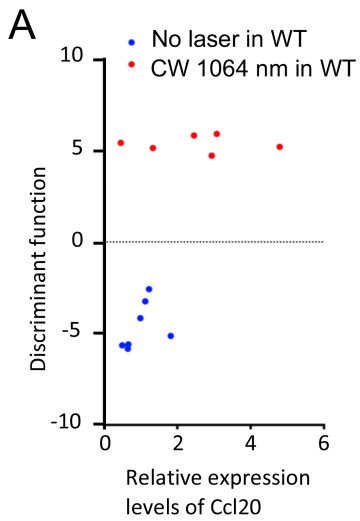

**B**

| Genes | Multivariate analysis | Univariate analysis |
|-------|-----------------------|---------------------|
| Ccl2  | 30.10275055           | 0.29972             |
| Ccl6  | -38.34811176          | 0.38442             |
| Ccl11 | 7.31377446            | 0.42976             |
| Ccl17 | 1.94451778            | 0.41399             |
| Ccl20 | 3.3547653             | 0.45419             |
| Ilg   | 1.45979257            | 0.25415             |
| Tnf   | -0.70122012           | -0.29116            |
| Il1a  | 6.06398491            | 0.41102             |
| Il1b  | -5.8476513            | 0.23706             |

**Supplementary Figure S3. The effect of the NIR laser on the chemokine expression in skin.**

The effect of the NIR laser on the chemokine expression in skin in WT mice. **A**, We ran a discriminant analysis to see if the 9 selected genes of importance could predict the effect of the CW NIR 1064 nm laser treatment on the chemokine expression for the data at 6 hours in WT mice. The multivariate discriminant analysis indicated a significant discriminant function with a canonical correlation of 0.98, indicating the significant treatment effect in WT mice. A scatterplot of values for the discriminant function for each record plotted against the values of the *Ccl20* gene is shown. Note the groups overlap somewhat on the gene *Ccl20*, but are distinctly separated from each other on the discriminant function. One sample from CW 1064 nm-treated group was removed from the multivariate discriminant analysis as this sample missed Tnf expression data.  $n = 7, 6-7$  for no laser, CW 1064 nm-treated groups. Results were pooled from 3 independent experiments. **B**, Canonical coefficient in multivariate and univariate analyses for each gene. The loading coefficients for all 9 genes on the discriminant function show that Ccl2 and Ccl6 are the major determinants in the multivariate analysis where class means of the discriminant function are -4.598591451 for no laser and 5.365023360 for CW 1064 nm groups, while Cc120 is the gene most predictive (but not statistically significant) of the effect of the CW 1064 nm treatment in the univariate analysis of a point-biserial correlation of treatment groups (numeric coded -1 for no NIR and +1 for the CW 1064 nm) vs. gene expressions.

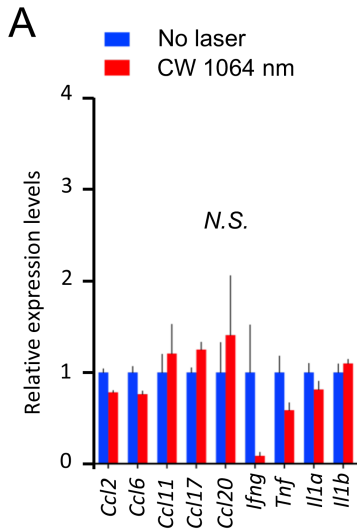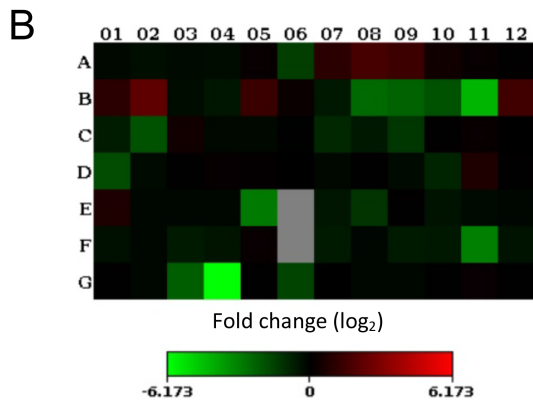

| Gene  | Fold changes |
|-------|--------------|
| CCL2  | 1.31         |
| CCL11 | 1.14         |
| CCL17 | 2.7          |
| CCL20 | 1.13         |
| CCL23 | 2.02         |
| IFNG  | 1.02         |
| TNF   | 1.04         |
| IL1A  | 1.03         |
| IL1B  | 0.74         |

| Layout | 01     | 02     | 03    | 04     | 05    | 06       | 07      | 08      | 09      | 10      | 11     | 12     |
|--------|--------|--------|-------|--------|-------|----------|---------|---------|---------|---------|--------|--------|
| A      | AIMP1  | BMP2   | C5    | CCL1   | CCL11 | CCL13    | CCL15   | CCL16   | CCL17   | CCL2    | CCL20  | CCL22  |
| B      | CCL23  | CCL24  | CCL26 | CCL3   | CCL4  | CCL5     | CCL7    | CCL8    | CCR1    | CCR2    | CCR3   | CCR4   |
| C      | CCR5   | CCR6   | CCR8  | CD40LG | CSF1  | CSF2     | CSF3    | CX3CL1  | CX3CR1  | CXCL1   | CXCL10 | CXCL11 |
| D      | CXCL12 | CXCL13 | CXCL2 | CXCL3  | CXCL5 | CXCL6    | CXCL9   | CXCR1   | CXCR2   | FASLG   | IFNA2  | IFNG   |
| E      | IL10RA | IL10RB | IL13  | IL15   | IL16  | IL17A    | IL17C   | IL17F   | IL1A    | IL1B    | IL1R1  | IL1RN  |
| F      | IL21   | IL27   | IL3   | IL33   | IL5   | IL5RA    | IL7     | CXCL8   | IL9     | IL9R    | LTA    | LTB    |
| G      | MIF    | NAMPT  | OSM   | SPP1   | TNF   | TNFRSF11 | TNFSF10 | TNFSF11 | TNFSF13 | TNFSF13 | TNFSF4 | VEGFA  |

**Supplementary Figure S4. The effect of the NIR laser on the chemokine expression in cultured BMDCs and keratinocytes.**

The effect of the NIR laser on the chemokine expression in fully differentiated murine BMDCs and human epidermal keratinocytes in culture. **A**, The expression of chemokines in BMDCs was measured 4 hours following the CW NIR laser treatment using qPCR. Error bars show means  $\pm$  s.e.m.  $n = 7, 7$ , for no laser control in WT, CW 1064 nm laser-treated groups, respectively. Results were pooled from 3 independent experiments. **B**, The expression of an array of inflammatory cytokines and receptors was examined 4 hours after the NIR laser treatment in keratinocytes.  $n = 4, 4$  for no laser, CW 1064 nm laser-treated groups. Representative data from two independent experiments are presented.
